# Supplementary material for: Single Institution Assessment of Compliance with Guideline Directed Aspirin Therapy in the Prevention of Colorectal Cancer in Lynch Syndrome
Source: Research Square preprint supplement (doi:10.21203/rs.3.rs-7189423/v1), 2025-07-30
Supplement: Supplementary file 1 [file be6e816f98786ee3a1bcaa57.docx]

**Supplemental Materials:**

| **Dose of Aspirin Taken** | **Patients on Aspirin Prior to Discussion** | **N (%)1** |
| --- | --- | --- |
| 81 mg | 2 | 41 (49.4) |
| 250 mg | 1 | 1 (1.2) |
| 325 mg | 0 | 35 (42.2) |
| Approx. 600 mg | 0 | 3 (3.6) |
| 650 mg | 0 | 3 (3.6) |

Supplemental Table 1. Breakdown of varying doses of aspirin taken by study subjects

1N representing number of patients and (%) indicating percentage of patients taking aspirin at each respective dose

| **Lynch Gene Mutation** | **Cumulative Risk of Diagnosis Through Age 801** | **Aspirin Use (%)2** |
| --- | --- | --- |
| **MLH1** | 46-61% | 11 (47.8) |
| **MSH2** | 33-52% | 18 (39.1) |
| **MSH6** | 10-44% | 35 (57.4) |
| **PMS2** | 8.7-20% | 19 (51.4) |

Supplemental Table 2. Aspirin usage for each specific Lynch gene mutations with the associated cumulative risk through age 80 years of age.

1Estimated cumulative incidence of colorectal cancer development among Lynch Syndrome pathogenic variant carriers based on available cohort studies from NCCN guidelines [14]

2Number of patients and (%) indicating percentage of all patients with corresponding mutation taking aspirin


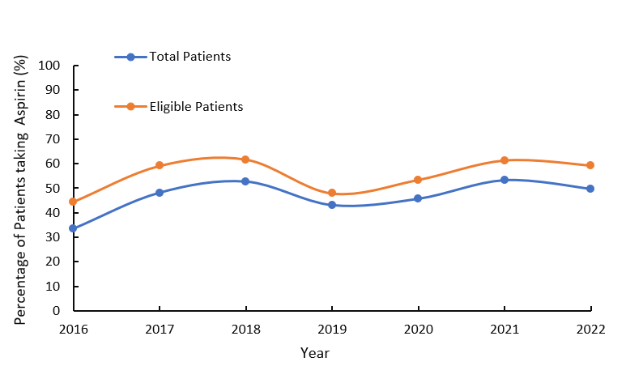


Supplemental Figure 1.The percentage of the total and eligible patients taking ASA between 2016 and 2022

| Year | Total Patients | Aspirin Use N1(%) | Not recommended | Not discussed | No reason given | Eligible Aspirin Use N2(%) |
| --- | --- | --- | --- | --- | --- | --- |
| 2016 | 12 | 4 (33.3) | 3 | 0 | 5 | 4 (44.4) |
| 2017 | 27 | 13 (48.1) | 5 | 0 | 9 | 13 (59.1) |
| 2018 | 55 | 29 (52.7) | 8 | 0 | 18 | 29 (61.7) |
| 2019 | 79 | 34 (43.0) | 8 | 0 | 37 | 34 (47.9) |
| 2020 | 103 | 47 (45.6) | 14 | 1 | 41 | 47 (53.4) |
| 2021 | 137 | 73 (53.3) | 17 | 1 | 46 | 73 (61.3) |
| 2022 | 167 | 83 (49.7) | 25 | 2 | 57 | 83 (58.5) |

Supplemental Table 3.The total and eligible patients taking ASA between 2016 and 2022

1N representing total number of patients and (%) indicating percentage of the total sample size

2Number of patients and (%) indicating percentage of eligible patients who have taken ASA excluding patients in which aspirin was not recommended or not discussed
